# Supplementary material for: Multiplexed CRISPR/Cas9-mediated knockout of 19 Fanconi anemia pathway genes in zebrafish revealed their roles in growth, sexual development and fertility
Source: PubMed Central journal article supplement (PMC6328202; doi:10.1371/journal.pgen.1007821), 2018-12-12

# S5 Fig

*fance*-WT

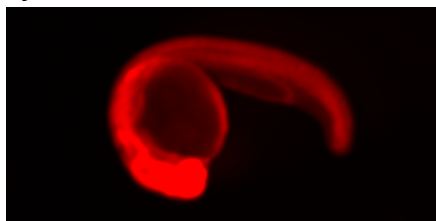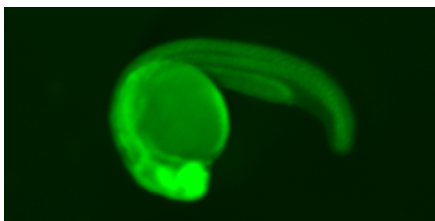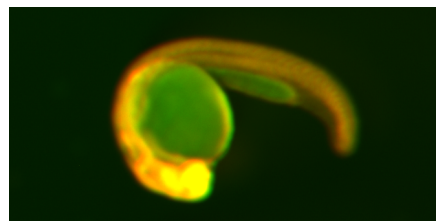

*fance*-hg48

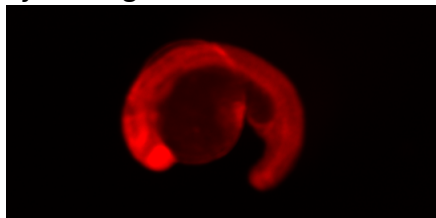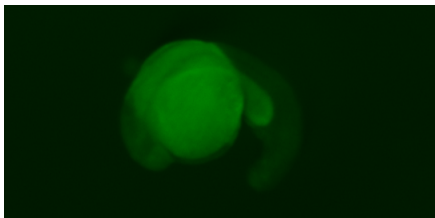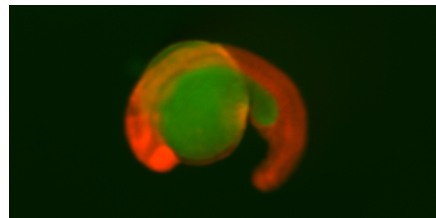

*fancf*-WT

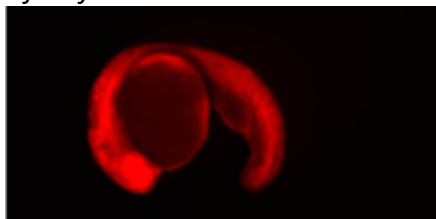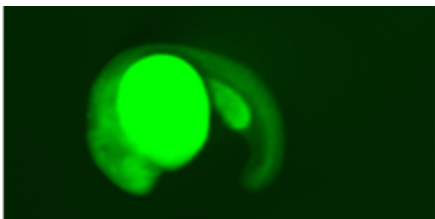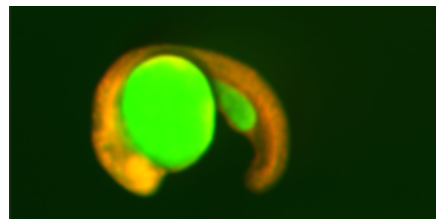

*fancf*-hg50

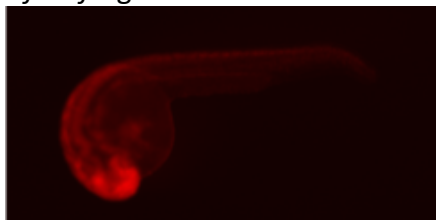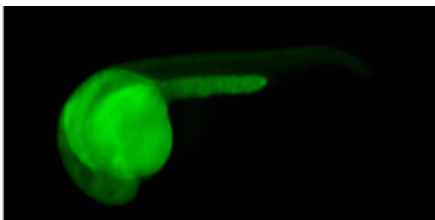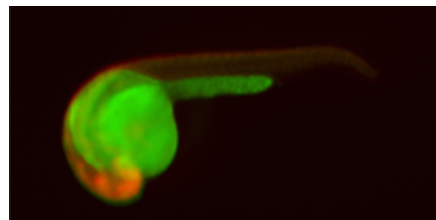

*fancg*-WT

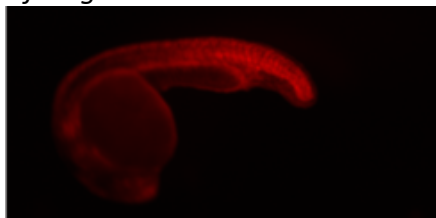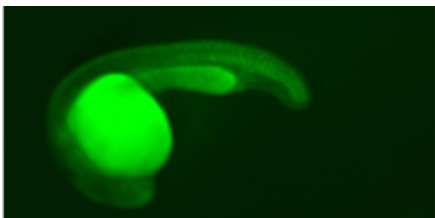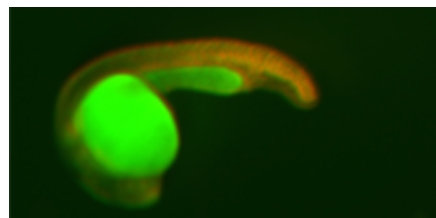

*fancg*-hg52

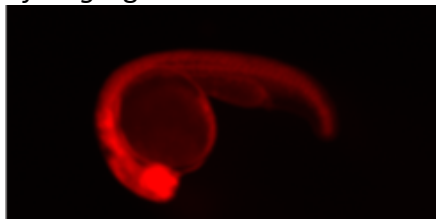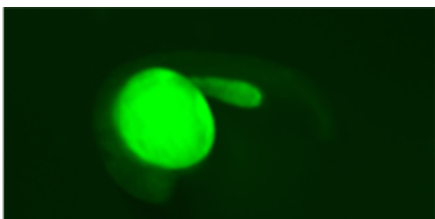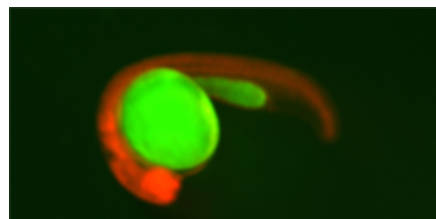

## S5 Fig continued

*fancl*-WT

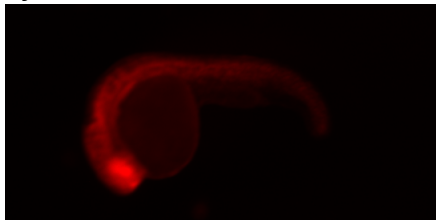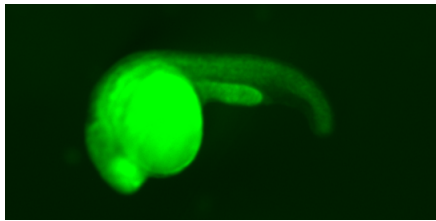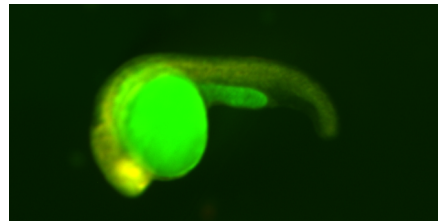

*fancl*-hg59

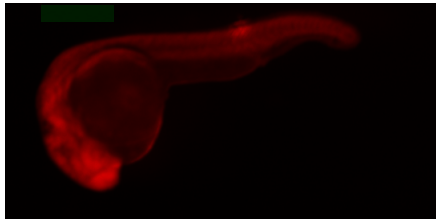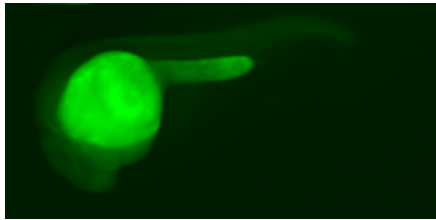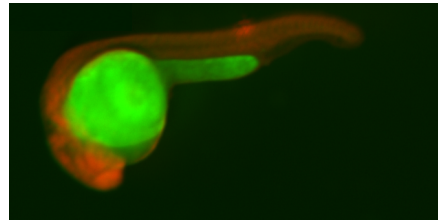

*fanct*-WT

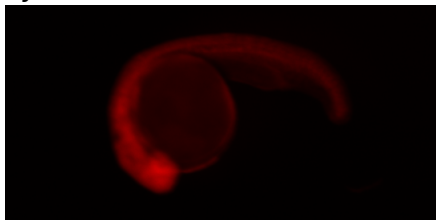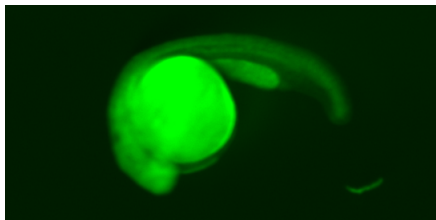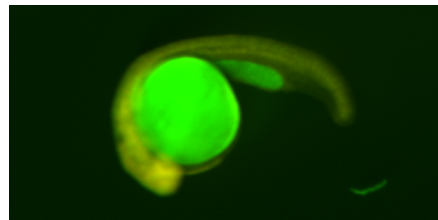

*fanct*-hg70

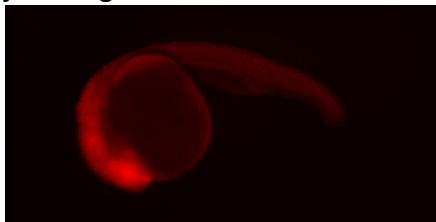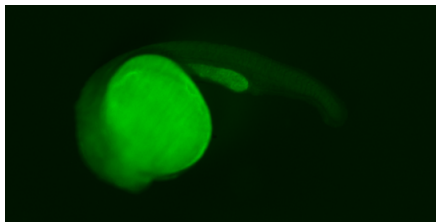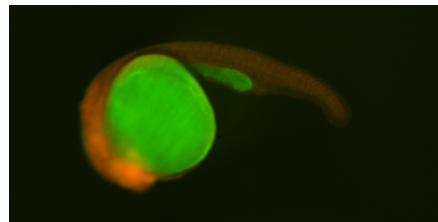

Supplement: pgen.1007821.s005.pdf [file pgen.1007821.s005.pdf]
