# Supplementary material for: Multiplexed CRISPR/Cas9-mediated knockout of 19 Fanconi anemia pathway genes in zebrafish revealed their roles in growth, sexual development and fertility
Source: PubMed Central journal article supplement (PMC6328202; doi:10.1371/journal.pgen.1007821), 2018-12-12

# S1 Fig

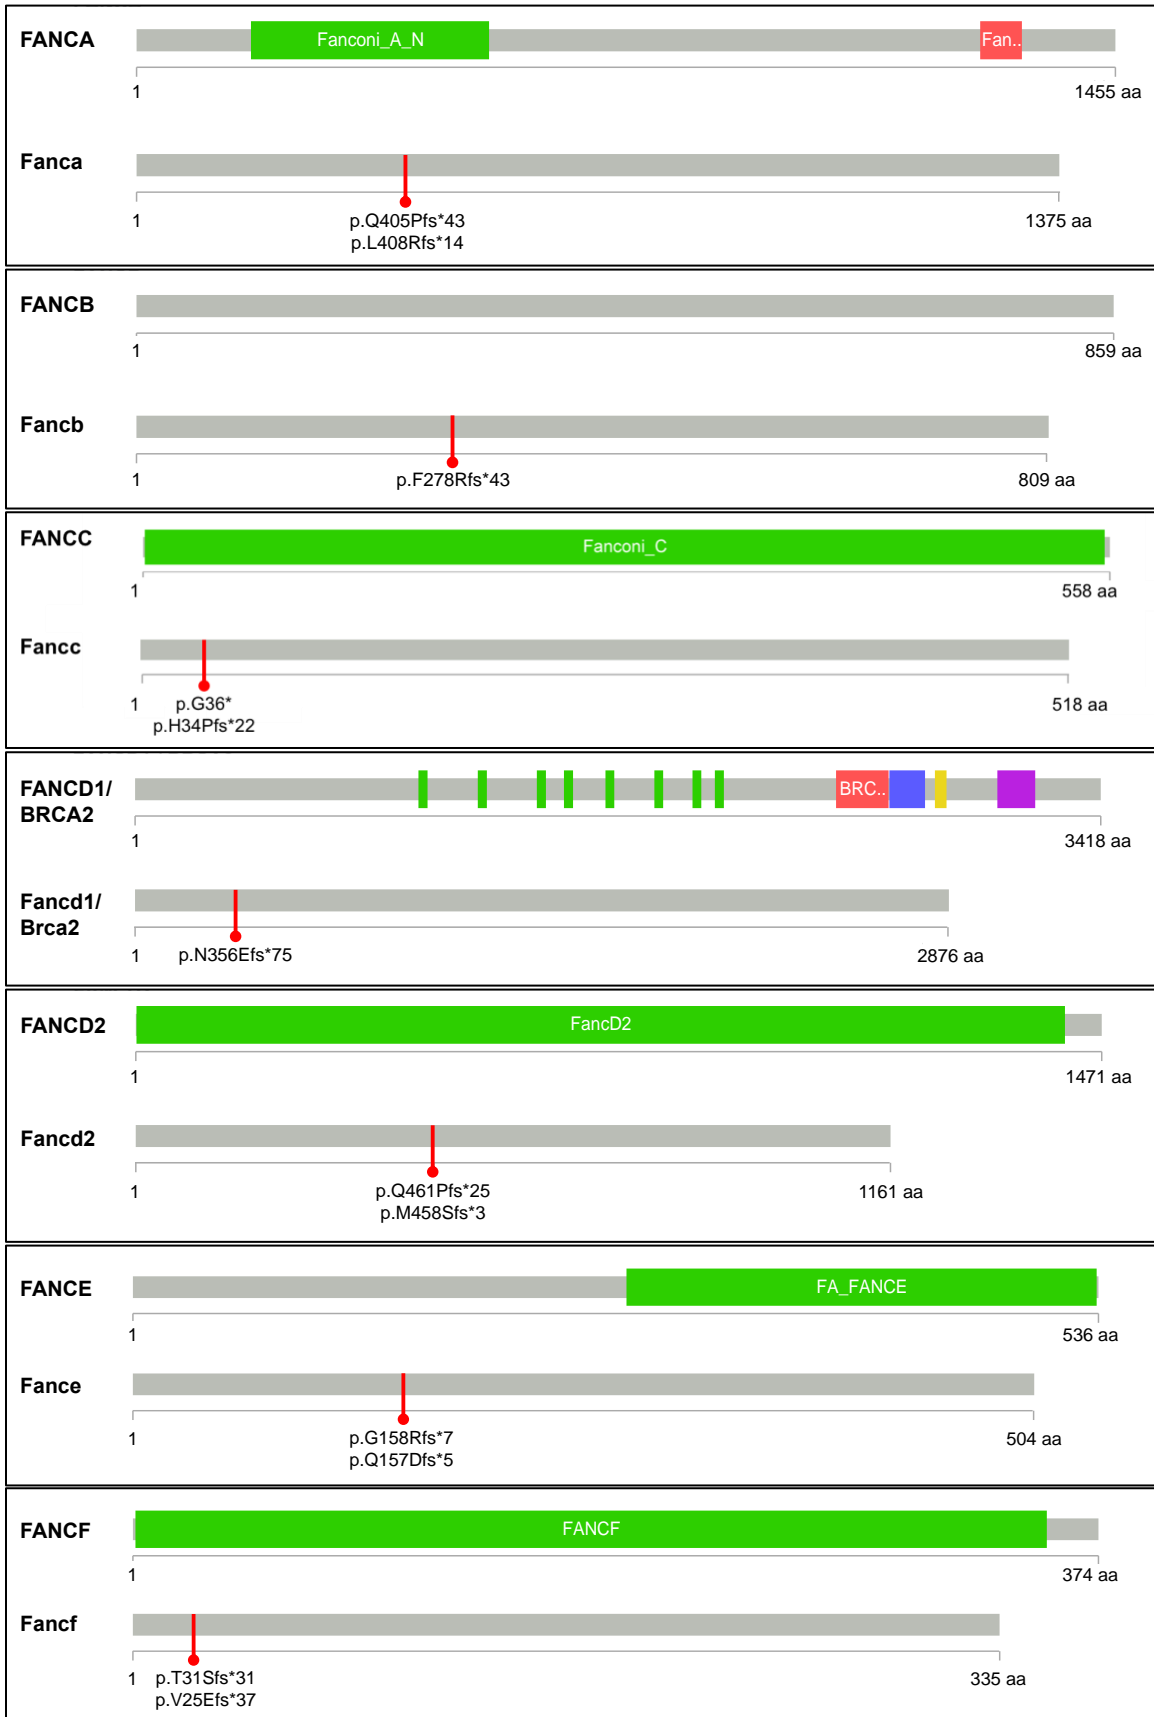

## S1 Fig continued

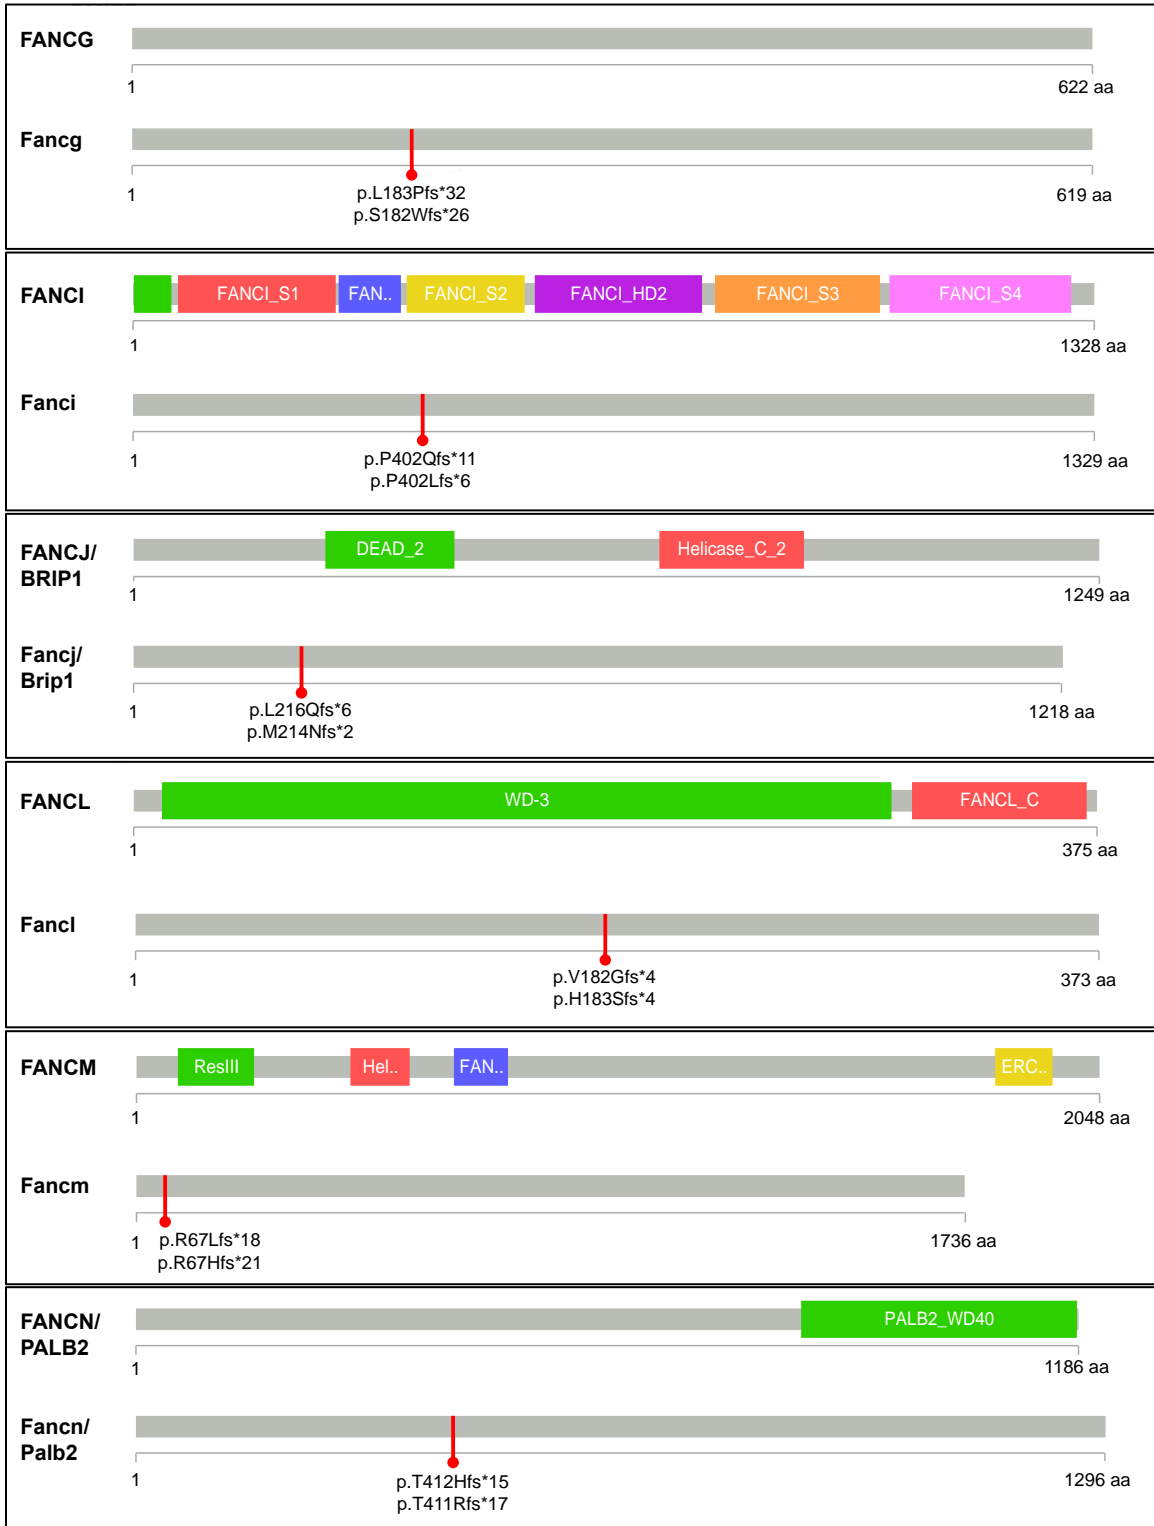

## S1 Fig continued

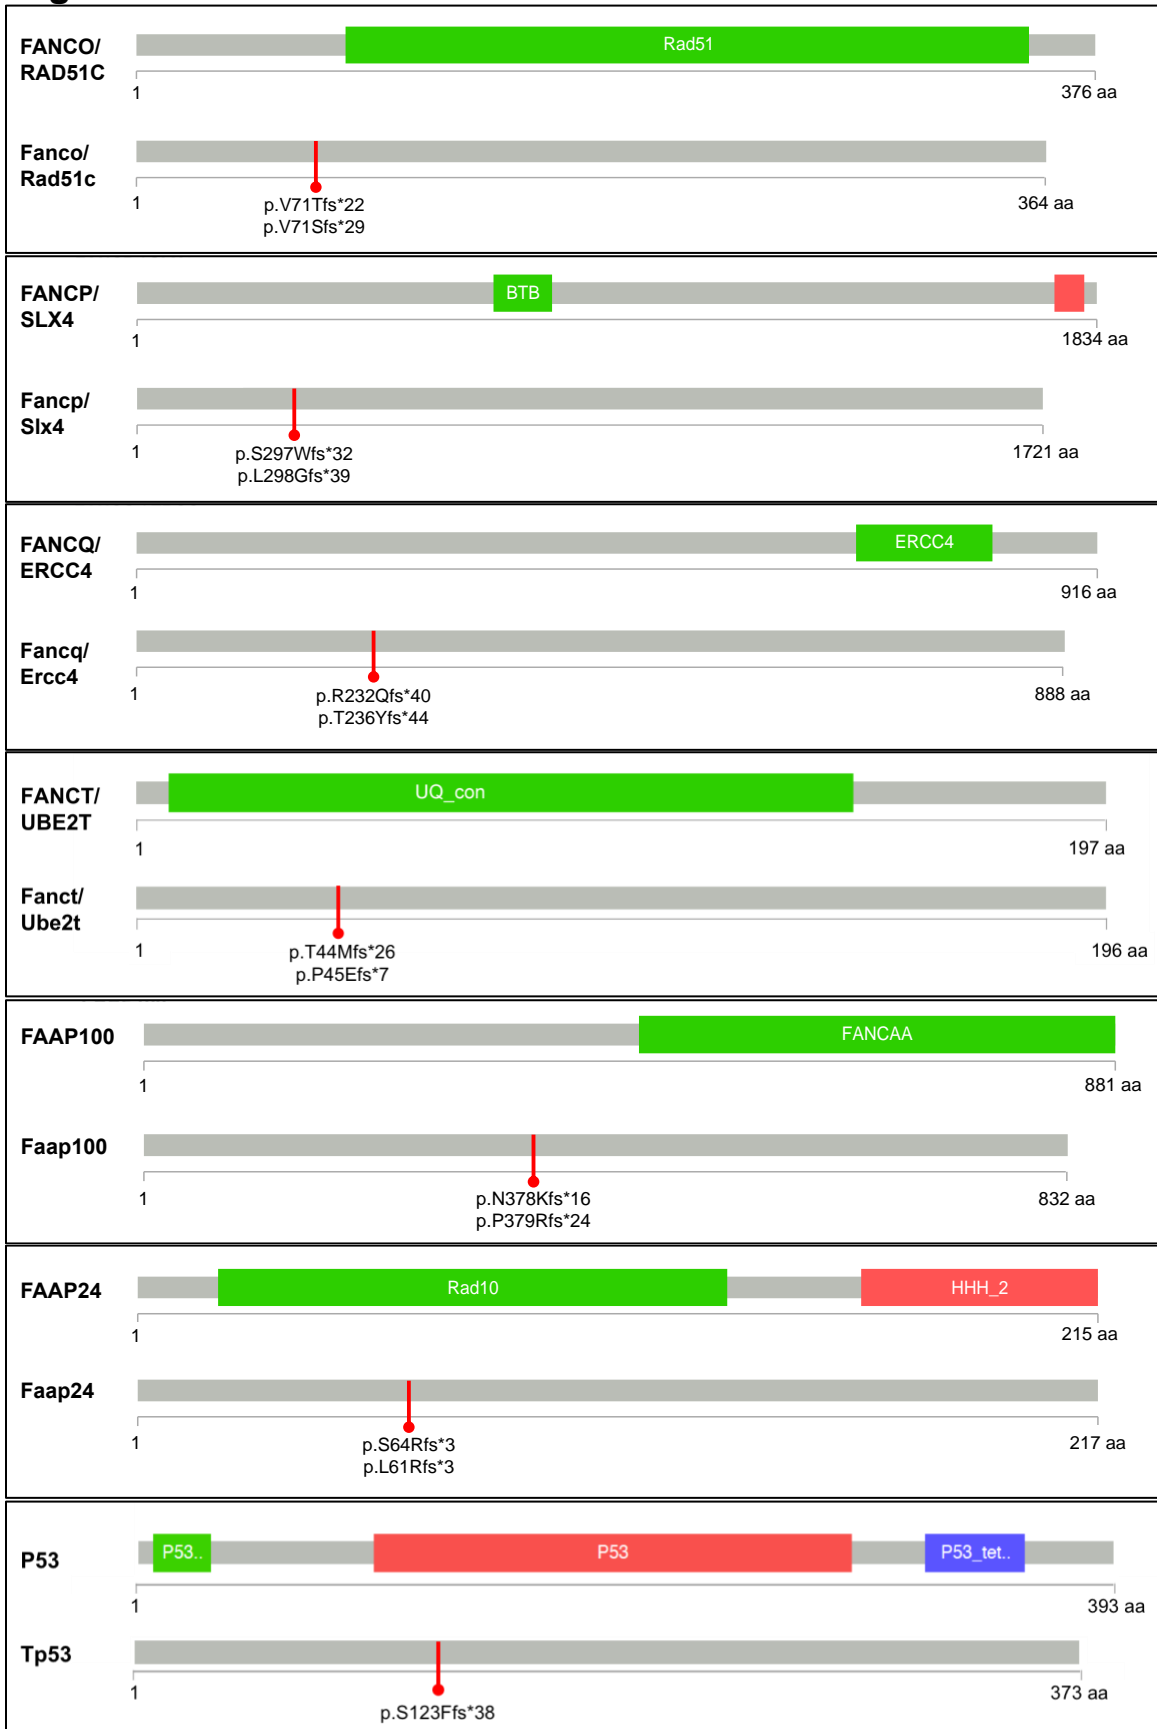

Supplement: pgen.1007821.s001.pdf [file pgen.1007821.s001.pdf]
