# Supplementary material for: Multiplexed CRISPR/Cas9-mediated knockout of 19 Fanconi anemia pathway genes in zebrafish revealed their roles in growth, sexual development and fertility
Source: PubMed Central journal article supplement (PMC6328202; doi:10.1371/journal.pgen.1007821), 2018-12-12
Supplement: pgen.1007821.s002.pdf [file pgen.1007821.s002.pdf]

## S2 Fig

|                      |                                                   |             |
|----------------------|---------------------------------------------------|-------------|
| <b><i>fanca</i></b>  |                                                   |             |
| WT                   | TGGCGCGGCAGGCGGCTCTCGAGGGCCCCAGCG//TCCAGTCC       | (1205-1248) |
| Δ34 (hg40)           | TGGCGCG-----//-----TCC                            |             |
| Δ2 (hg41)            | TGGCGCGGCAGGCGGCTC--GAGGGCCCCAGCG                 |             |
| <b><i>fancb</i></b>  |                                                   |             |
| WT                   | ATGTCTGCGCGGTGTGGAAGGACACTTTCCAGGTGGTCTG          | (806-845)   |
| Δ4 (hg42)            | ATGTCTGCGCGGTGTGGAAGGACACT-----AGGTGGTCTG         |             |
| <b><i>fanc c</i></b> |                                                   |             |
| WT                   | CAGCTCTTCTGGACACTAGCAGACACCTTGGCCCTCTGAG          | (77-116)    |
| Δ1 (hg43)            | CAGCTCTTCTGGACACTAGCAGACAC--TTGGCCCTCTGAG         |             |
| Δ2 (hg44)            | CAGCTCTTCTGGACACTAGCAGAC--CTTGGCCCTCTGAG          |             |
| <b><i>fancd1</i></b> |                                                   |             |
| WT                   | ACTTCTTTGGTAGACAATAACAACACGGTGGCACCCA             | (1048-1084) |
| +5bp (Δ7, +12; hg45) | ACTTCTTTGGTAGACAATgaattaagttatCGGTGGCACCCA        |             |
| <b><i>fancd2</i></b> |                                                   |             |
| WT                   | GCCTTTCGGGGTCACATGTACAAACAGGCCTTCACTGCCT          | (1356-1396) |
| Δ4 (hg46)            | GCCTTTCGGGGTCACATGTACA-----GGCCTTCACTGCCT         |             |
| Δ20 (hg47)           | GCCTTTCGGGGTCACA-----GCCT                         |             |
| <b><i>fance</i></b>  |                                                   |             |
| WT                   | GGAAGATTTCCGGGTACTGATGTACAGGGAGGGTGGACAT          | (445-484)   |
| Δ2 (hg48)            | GGAAGATTTCCGGGTACTGATGTACAG--AGGGTGGACAT          |             |
| Δ11 (hg49)           | GGAAGATTTCCGGGTACTGA-----GGTGGACAT                |             |
| <b><i>fancf</i></b>  |                                                   |             |
| WT                   | GTGCGCGAATGGGACCGTCCCACCACACAGCGGGCGTTTA          | (67-106)    |
| Δ4 (hg50)            | GTGCGCGAATGGGACCGTCCCACCA-----GCGGGCGTTTA         |             |
| Δ10 (Δ23, +13; hg51) | GTGCGCG---taagaaaatggga-----CGGGCGTTTA            |             |
| <b><i>fancg</i></b>  |                                                   |             |
| WT                   | CTCTGAGACTGGAAGAAGACACCTCACTAATGGTTGCCAT          | (521-560)   |
| Δ5 (Δ7, +2; hg52)    | CTCTGAGACTGGAAGAAGACACCTCAC--ca---TGCCAT          |             |
| Δ7 (hg53)            | CTCTGAGACTGGAAGAAGACAC-----ATGGTTGCCAT            |             |
| <b><i>fanci</i></b>  |                                                   |             |
| WT                   | CTCATTCGGCCCTAAACCAGGACCATTCCGGAAAGGTG            | (1182-1218) |
| Δ8 (hg54)            | CTCATTCGGCCCTAAACCAGGAC-----AAGGTG                |             |
| +2 (Δ3, +5; hg55)    | CTCATTCGGCCCTAAACCAGGcctaaATTCCGGAAAGGTG          |             |
| <b><i>fancj</i></b>  |                                                   |             |
| WT                   | ACTTGGACCA <b>TGGAATTGAACAACGGAGCC</b> AGAGCTGACA | (631-670)   |
| Δ5 (hg56)            | ACTTGGACCATG-----GAACAACGGAGCCAGAGCTGACA          |             |
| Δ4 (hg57)            | ACTTGGACC-----AATTGAACAACGGAGCCAGAGCTGACA         |             |

## S2 Fig continued

---

### *fanc1*

WT GCCAACGTCCACAGCCAGTTCCT (538-560)  
+25 (hg58) GCCAACGgattgatatgatttatgttgatggcTCCACAGCCAGTTCCT  
 $\Delta$ 7 (hg59) GCCAAC-----GCCAGTTCCT

---

### *fancm*

WT TCCGCCGGCCGTGTCTGGATCTACCCACCAACCTGC (190-226)  
 $\Delta$ 5 (hg60) TCCGCCGGCC-----TGGATCTACCCACCAACCTGC  
+4 (hg61) TCCGCCGGCCatctGTGTCTGGATCTACCCACCAACCTGC

---

### *fancn*

WT GAGGAGAGGGACGTCGAAGAACGACTGTAGGACCCACA (1212-1248)  
 $\Delta$ 11 (hg62) GAGGAGAGGACGTCGAAGAAC-----CCACA  
 $\Delta$ 8 (hg63) GAGGAGAGGACGTCGAAGAA-----GGACCCACA

---

### *fanco*

WT AGAGGGCAGCAGCAGACGGCGTAACGGCACT (191-221)  
 $\Delta$ 8 (hg64) AGAGGGCAGCAGCAG-----ACGGCACT  
+13 ( $\Delta$ 1, +14; hg65) AGAGGGCAGCAGCAGACGGCagtggatcaatataTAACGGCACT

---

### *fancp*

WT GGCGCTGGCTCTGTCCCGCTCTCTGCTGGAGCAGGA (870-905)  
 $\Delta$ 7 (hg66) GGCGCTGGCTCTGTCCCGCT-----GGAGCAGGA  
 $\Delta$ 5 (hg67) GGCGCTGGCTCTGTCCCGCTCT-----GGAGCAGGA

---

### *fancq*

WT CGCTACAACCCCACACTGGAAGCAGAAGACCTTTTCT (694-729)  
 $\Delta$ 22 (hg68) C-----AGAAGACCTTTTCT  
+2 ( $\Delta$ 2, +4; hg69) CGCTACAACCCCACTacaTGGAAGCAGAAGACCTTTTCT

---

### *fancu (ube2t)*

WT TGGAGGTGCAAACACTCCGTATGAAGGTGGTG (217-248)  
 $\Delta$ 7 (hg70) TGGAGGTGCAAACA-----TGAAGGTGGTG  
+13 ( $\Delta$ 4, +17; hg71) TGGAGGTGCAAACACTgaaggtgaagtgtctggATGAAGGTGGTG

---

### *faap100*

WT ACTTGCTGGACCATATACAAACCCAAACAGGGTCCGTT (1113-1149)  
 $\Delta$ 4 (hg72) ACTTGCTGGACCATATACAA-----AACAGGGTCCGTT  
 $\Delta$ 5 (hg73) ACTTGCTGGACCATATACA-----AACAGGGTCCGTT

---

### *faap24*

WT GTGTCCTCTATGTGTCAGAAAGTGACCTTGGTGGCAGG (176-212)  
 $\Delta$ 2 (hg74) GTGTCCTCTATGT--CAGAAAGTGACCTGGTGGCAGG  
 $\Delta$ 11 (hg75) GTGTC-----AGAAAGTGACCTGGTGGCAGG

---

### *tp53*

WT CCTCCACAGGGCTCCGTGGTTCGAGCCACTGCCATCTA (355-392)  
 $\Delta$ 7 (hg91) CCTCCACAGGGCT-----TCGAGCCACTGCCATCTA

---
